# Supplementary material for: Advances in the characterisation and identification of mastic (Pistaciasp.) resin in archaeological samples by GC-QToF-MS
Source: Royal Society of Chemistry journal article supplement (doi:10.1039/d3ra06651g), 2024-01-01
Supplement: d3ra06651g1.pdf [file d3ra06651g1.pdf]

## Supplementary Information

### **Advances in the study of mastic (*Pistacia* sp.) resin composition, use and heat-induced alteration in archaeological contexts by gas chromatography coupled to high resolution and high accuracy mass spectrometry**

Diego Tamburini<sup>1\*</sup>, Kate Fulcher<sup>1</sup>, Lisa Briggs<sup>1,2</sup>, Nelly von Aderkas<sup>1</sup>, Cemal Pulak<sup>3</sup>, Rebecca Stacey<sup>1</sup>

<sup>1</sup> Department of Scientific Research, The British Museum, Great Russell Street, London WC1B 3DG, UK

<sup>2</sup> Cranfield University, College Rd, Cranfield, Wharley End, Bedford MK43 0AL, United Kingdom

<sup>3</sup> Institute of Nautical Archaeology at Texas A&M University; Department of Anthropology, Texas A&M University, College Station, Texas, United States

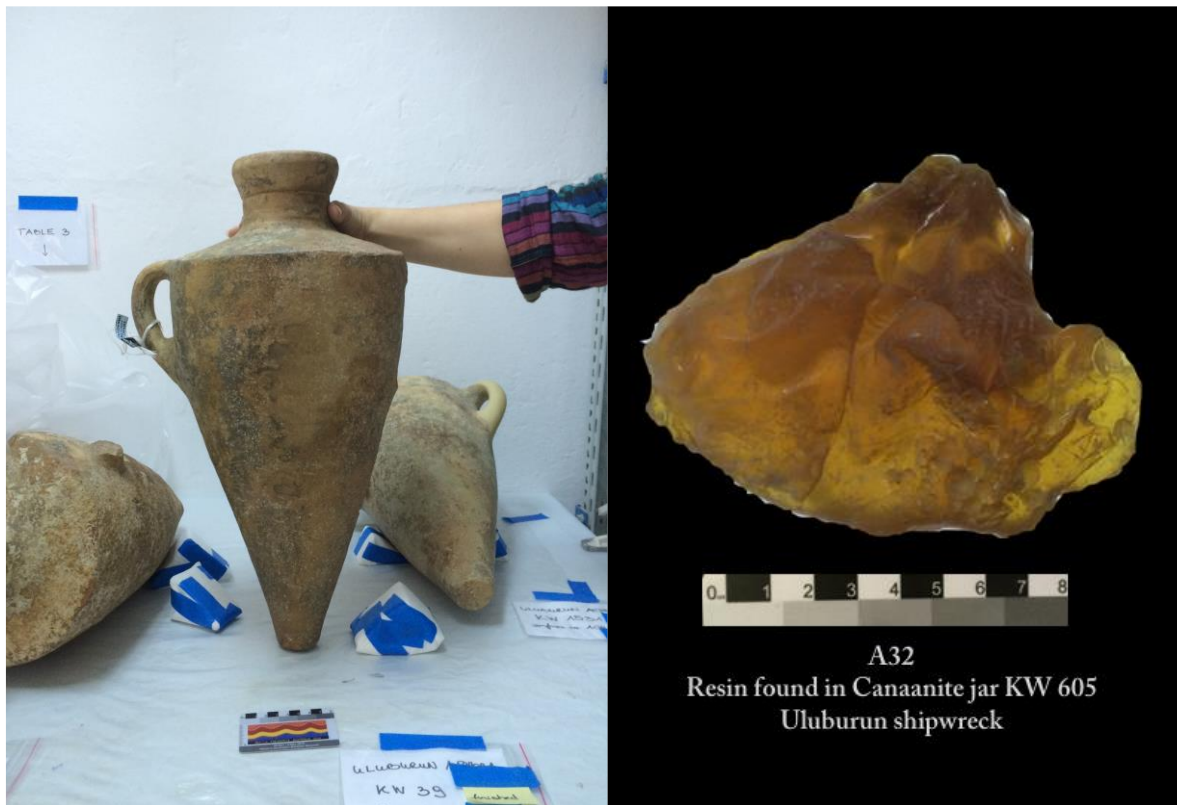

**Figure S1.** Images of Canaanite jar KW 39 (left) and resin sample KW 605 (right). The sample designations are derived from the number ascribed to each Canaanite jar; for example, Canaanite jar KW 39 yielded resin sample KW 39, and so on.

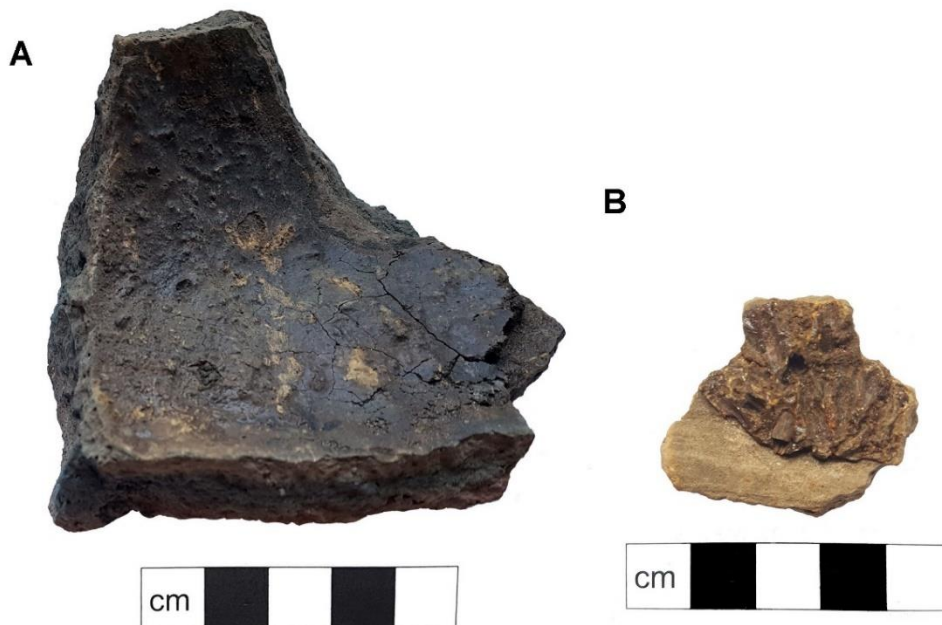

**Figure S2.** Images of the incense burners from Sai. Sample Sai 012 was taken from A and sample Sai 0245 was taken from B. © The Trustees of the British Museum. Shared under a Creative Commons Attribution-NonCommercial-ShareAlike 4.0 International (CC BY-NC-SA 4.0) licence.

C2 EA6666

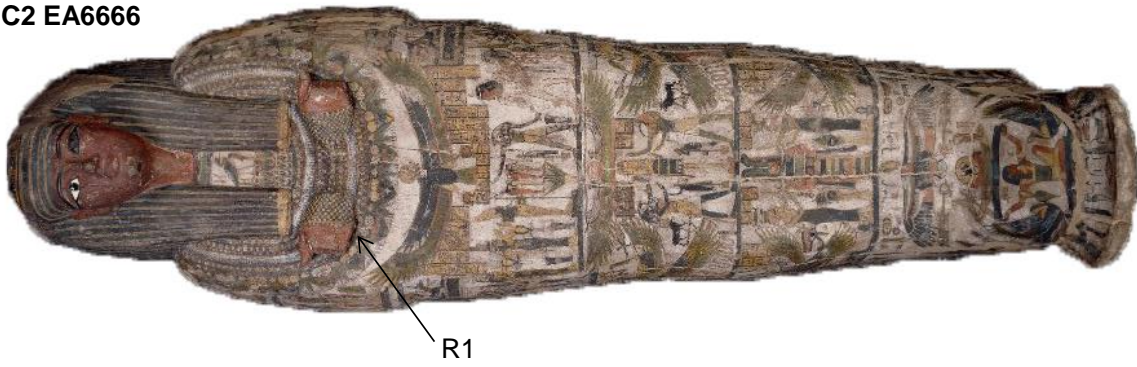

C4 EA29577

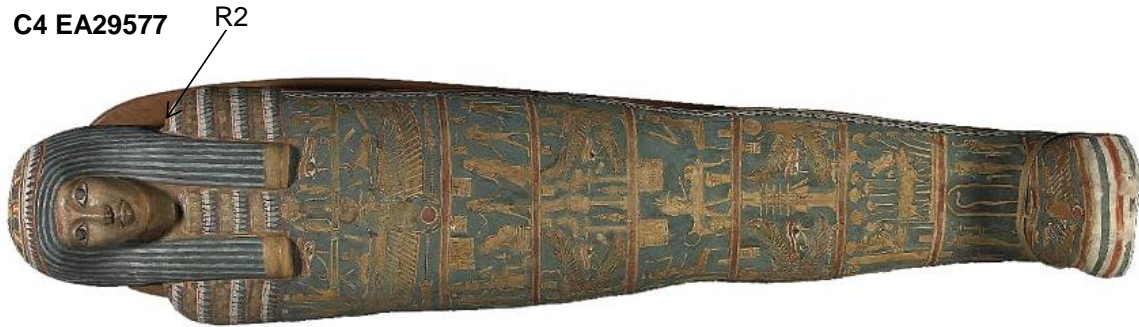

C11 EA6685

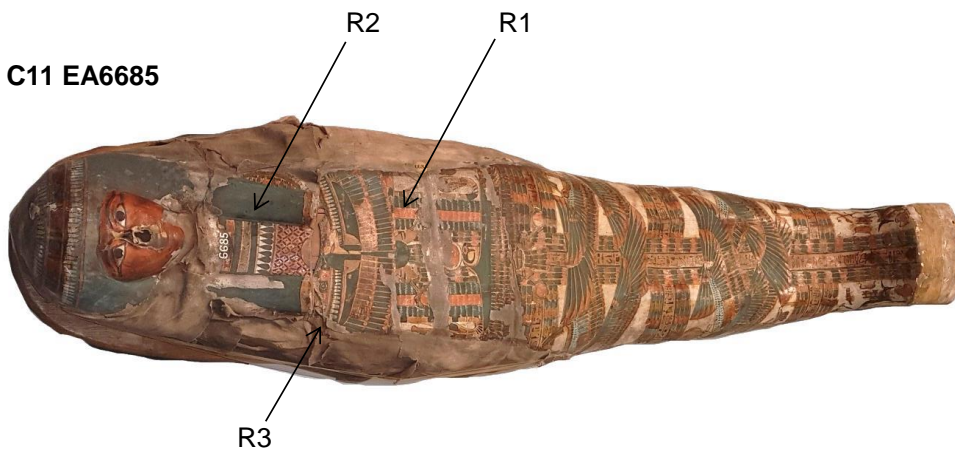

**Figure S3.** Images of the coffins from the British Museum's collection and sampling locations.

© The Trustees of the British Museum. Shared under a Creative Commons Attribution-NonCommercial-ShareAlike 4.0 International (CC BY-NC-SA 4.0) licence.



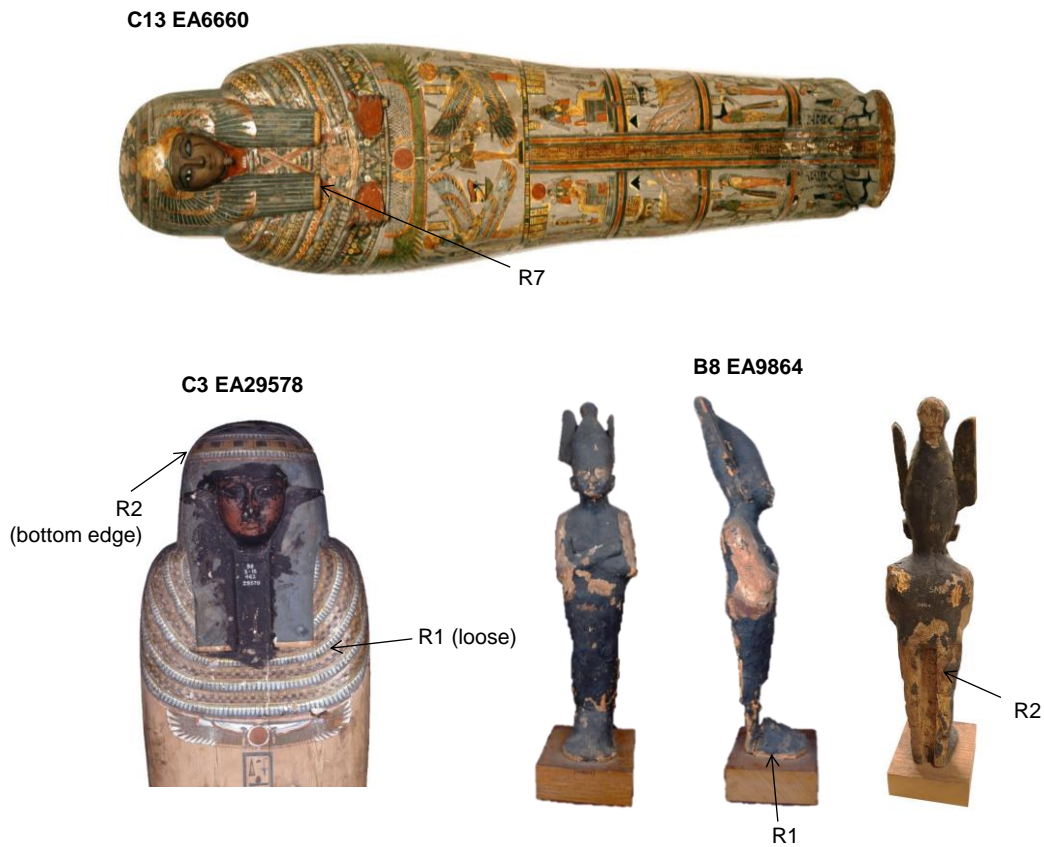

**Figure S4.** Images of the coffins/objects from the British Museum's collection and sampling locations. © The Trustees of the British Museum. Shared under a Creative Commons Attribution-NonCommercial-ShareAlike 4.0 International (CC BY-NC-SA 4.0) licence.

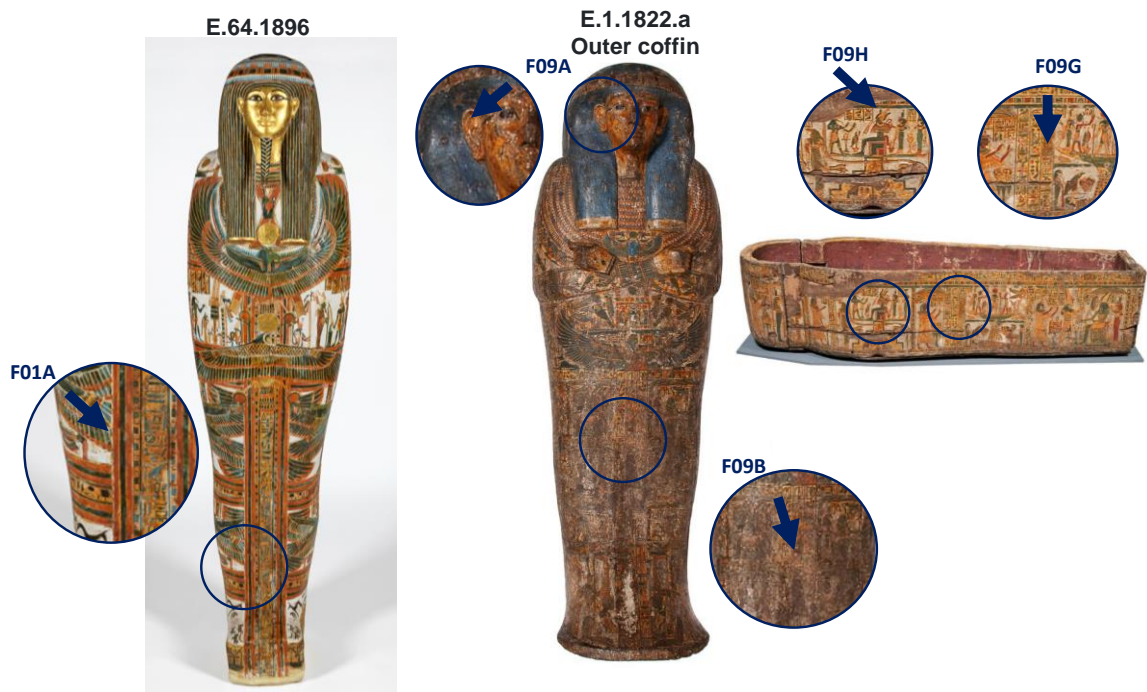

**Figure S5.** Images of the coffins from the Fitzwilliam Museum's collection and sampling locations. © Fitzwilliam Museum.

E.1.1822.b  
Inner coffin

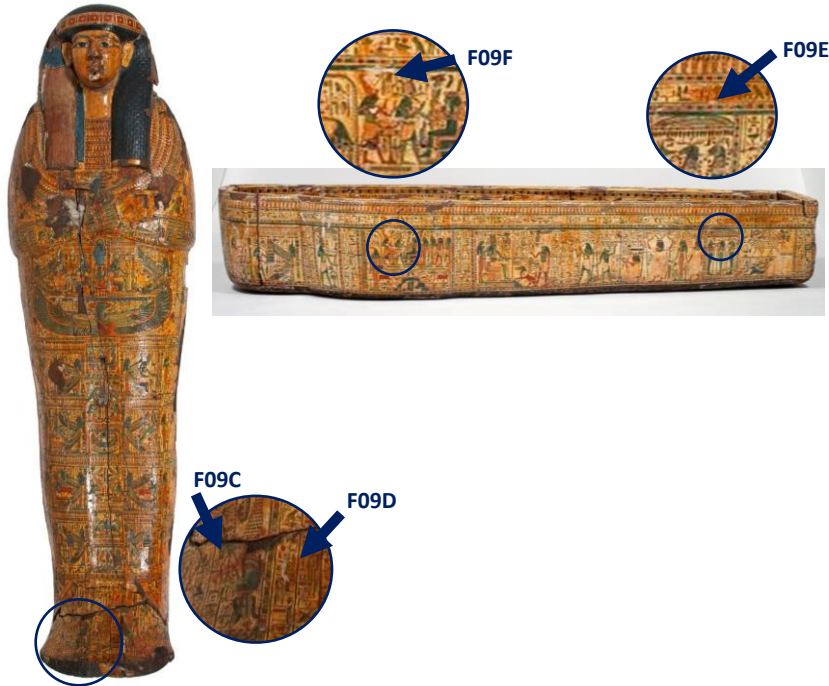

E.1.1822.c  
Mummy board

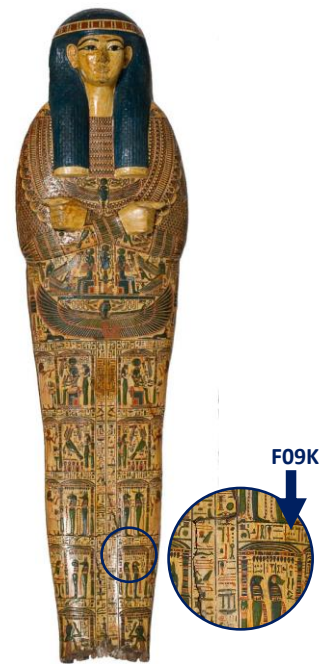

**Figure S6.** Images of the coffins from the Fitzwilliam Museum's collection and sampling locations.  
© Fitzwilliam Museum.

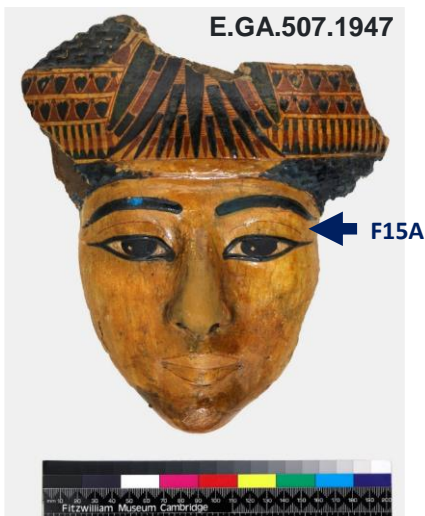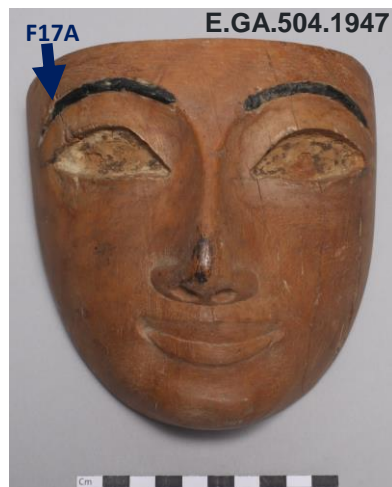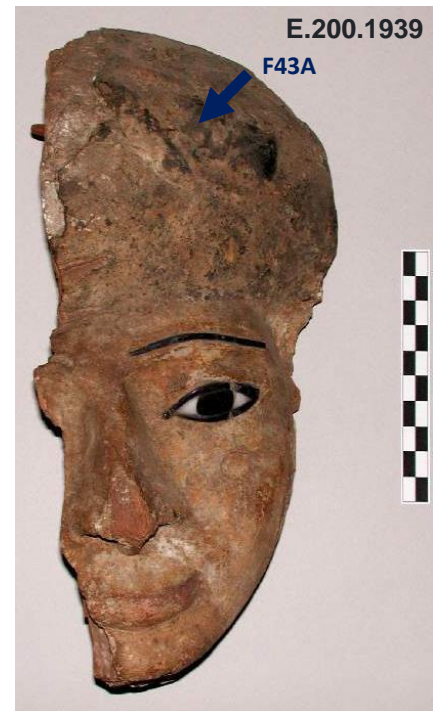

**Figure S7.** Images of the coffins (faces) from the Fitzwilliam Museum's collection and sampling locations. © Fitzwilliam Museum.



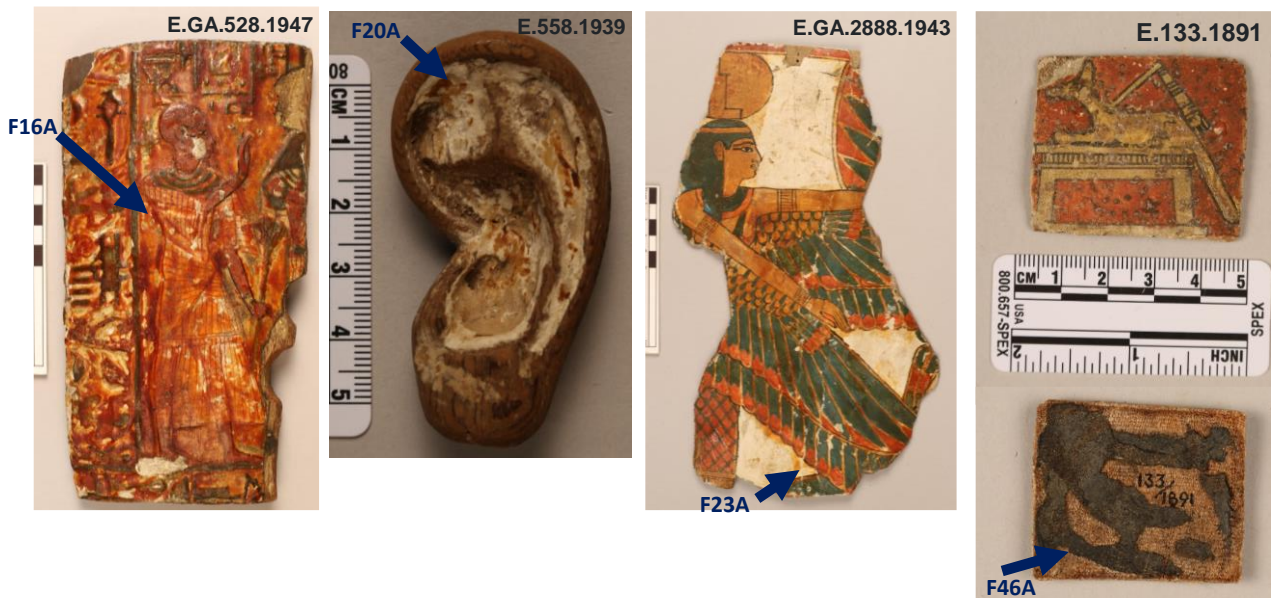

**Figure S8.** Images of coffin and cartonnage fragments from the Fitzwilliam Museum's collection and sampling locations. © Fitzwilliam Museum

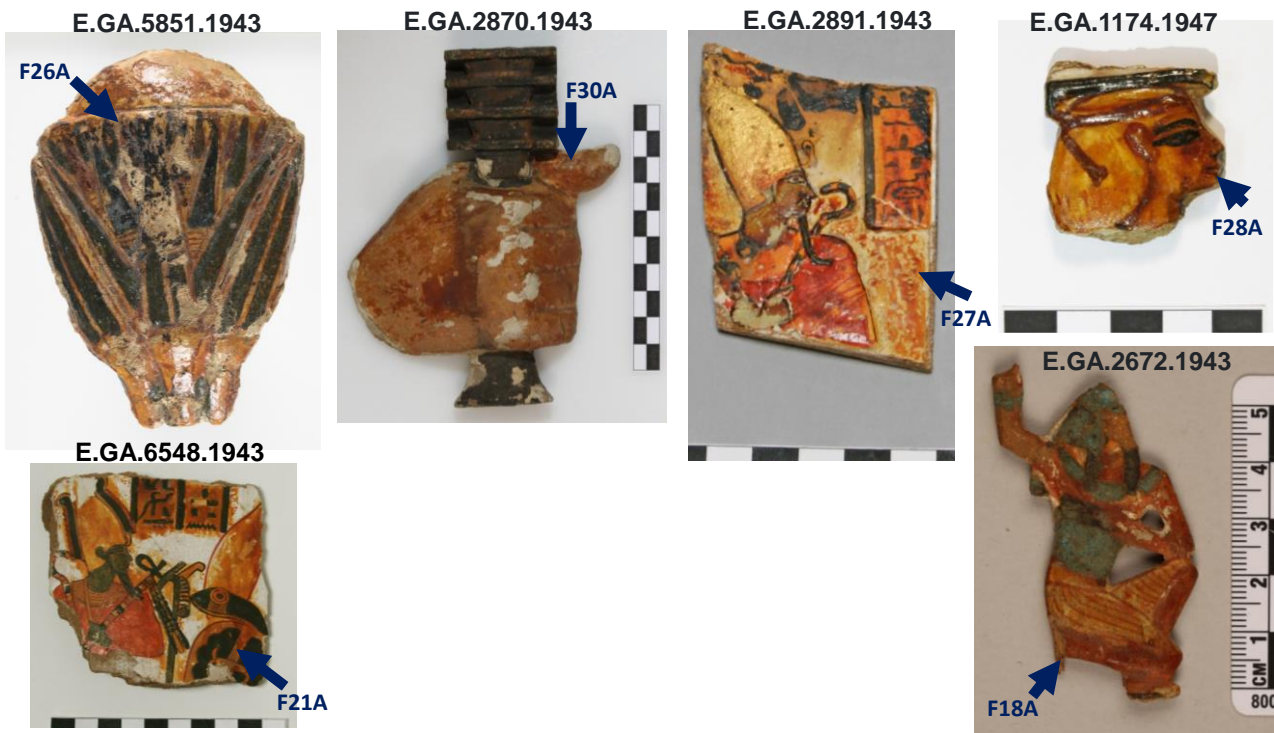

**Figure S9.** Images of coffin/cartonnage fragments from the Fitzwilliam Museum's collection and sampling locations. © Fitzwilliam Museum

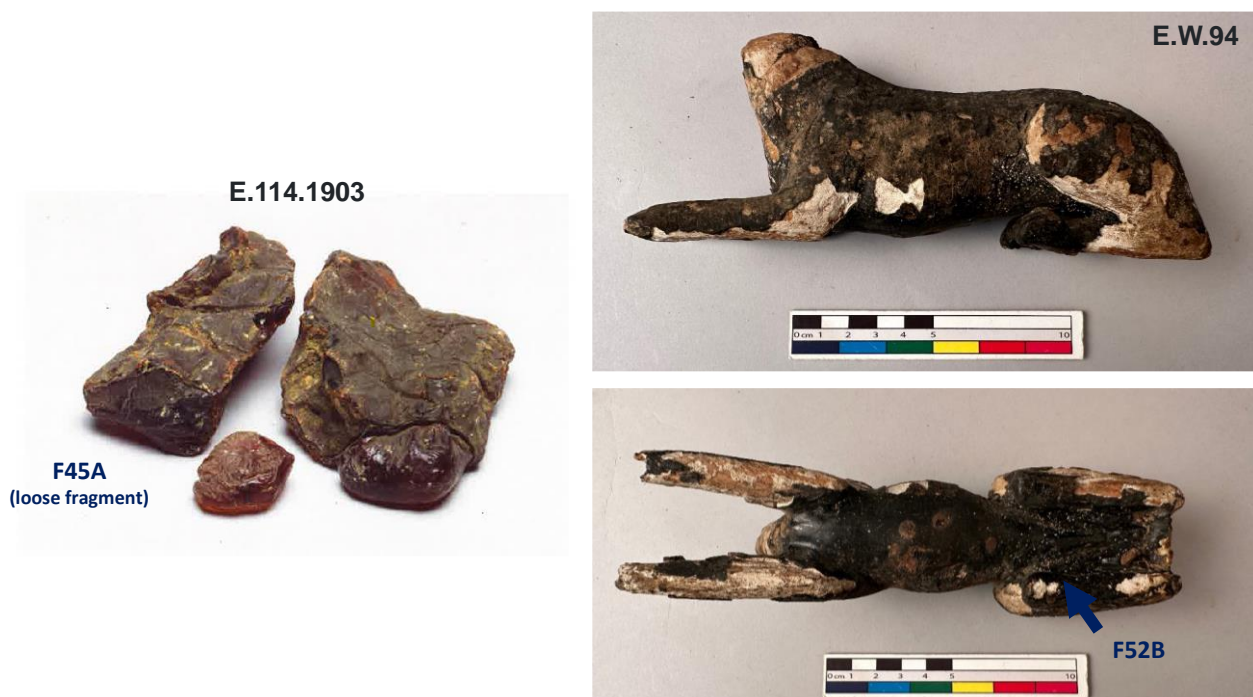

**Figure S10.** Images of resin lump (E.114.1903) and jackal figure (E.W.94) from the Fitzwilliam Museum's collection and sampling locations. © Fitzwilliam Museum

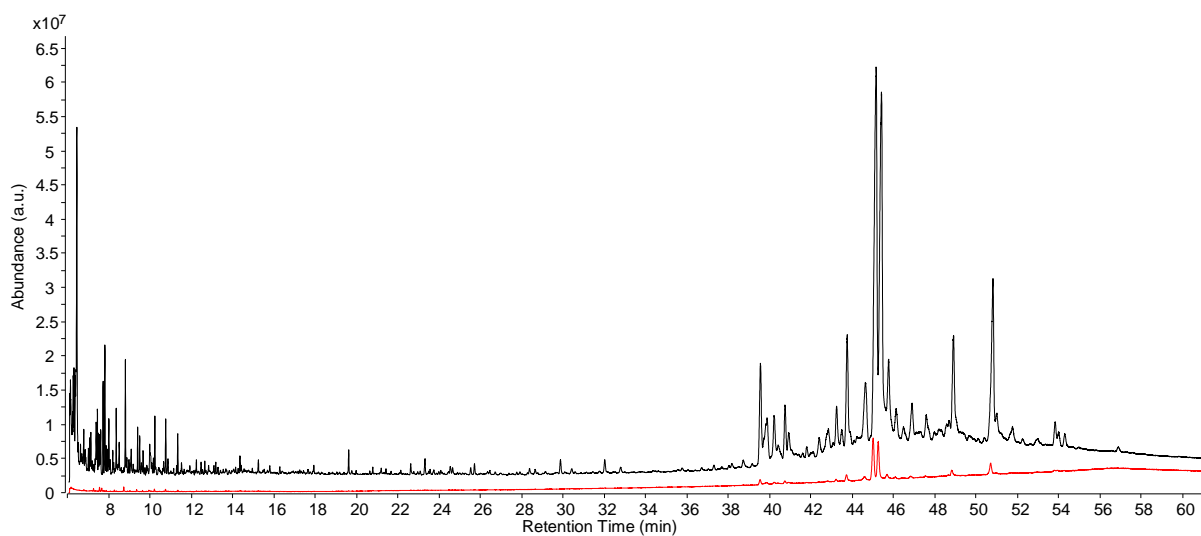

**Figure S11.** Comparison between the chromatograms obtained for *Pistacia* resin in splitless mode (black) and 1:10 split ratio (red). © The Trustees of the British Museum. Shared under a Creative Commons Attribution-NonCommercial-ShareAlike 4.0 International (CC BY-NC-SA 4.0) licence.

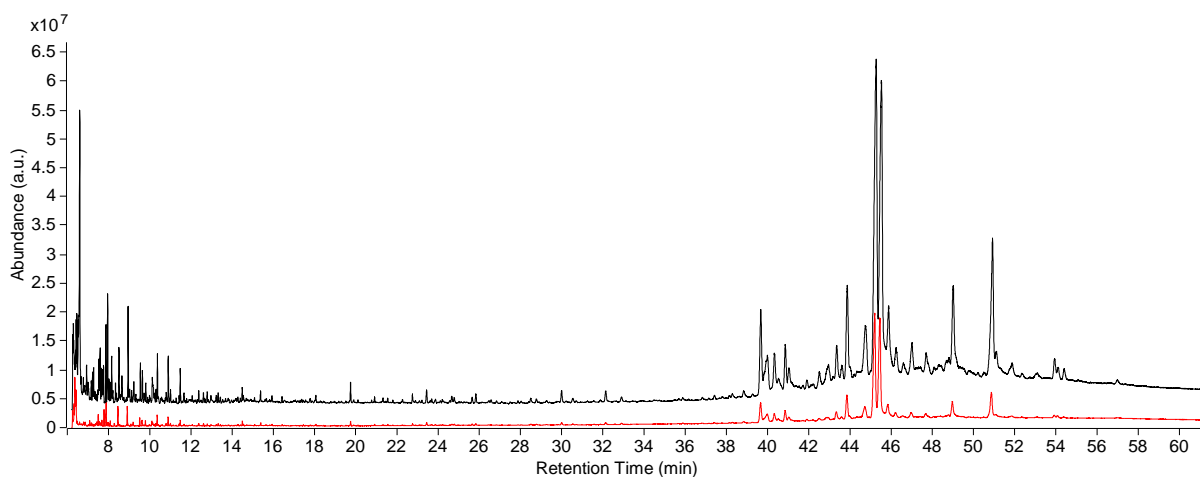

**Figure S12.** Comparison between the chromatograms obtained for *Pistacia* resin in standard EI mode (black) and low EI mode (red). © The Trustees of the British Museum. Shared under a Creative Commons Attribution-NonCommercial-ShareAlike 4.0 International (CC BY-NC-SA 4.0) licence.

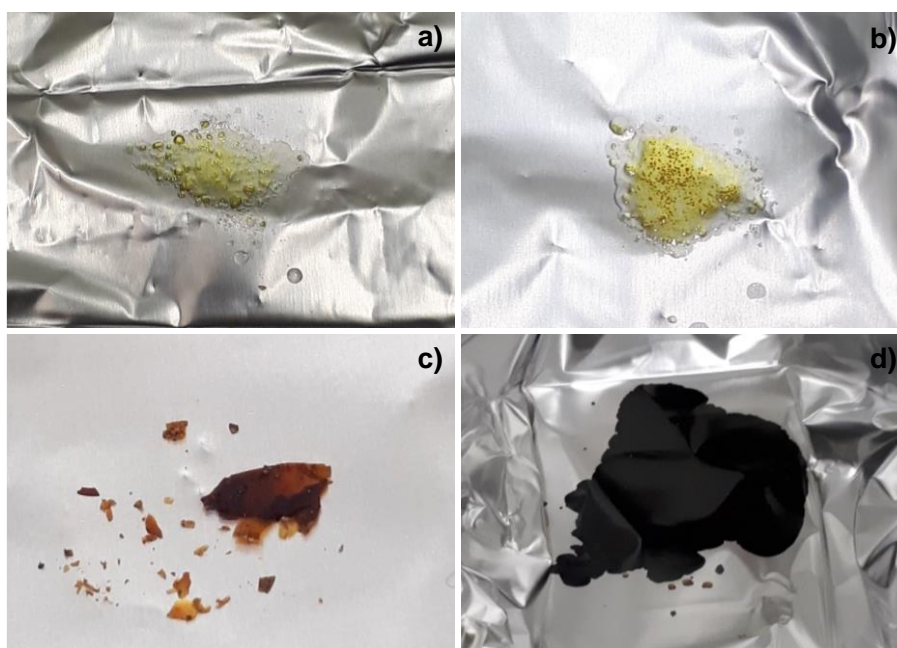

**Figure S13.** Images showing the differences in appearance of the *Pistacia* reference samples after the heating experiment: **a)** 100°C for 4 hours; **b)** 100°C for 8 hours; **c)** 250°C for 2.5 hours; **d)** 400°C for 10 mins. © The Trustees of the British Museum. Shared under a Creative Commons Attribution-NonCommercial-ShareAlike 4.0 International (CC BY-NC-SA 4.0) licence.



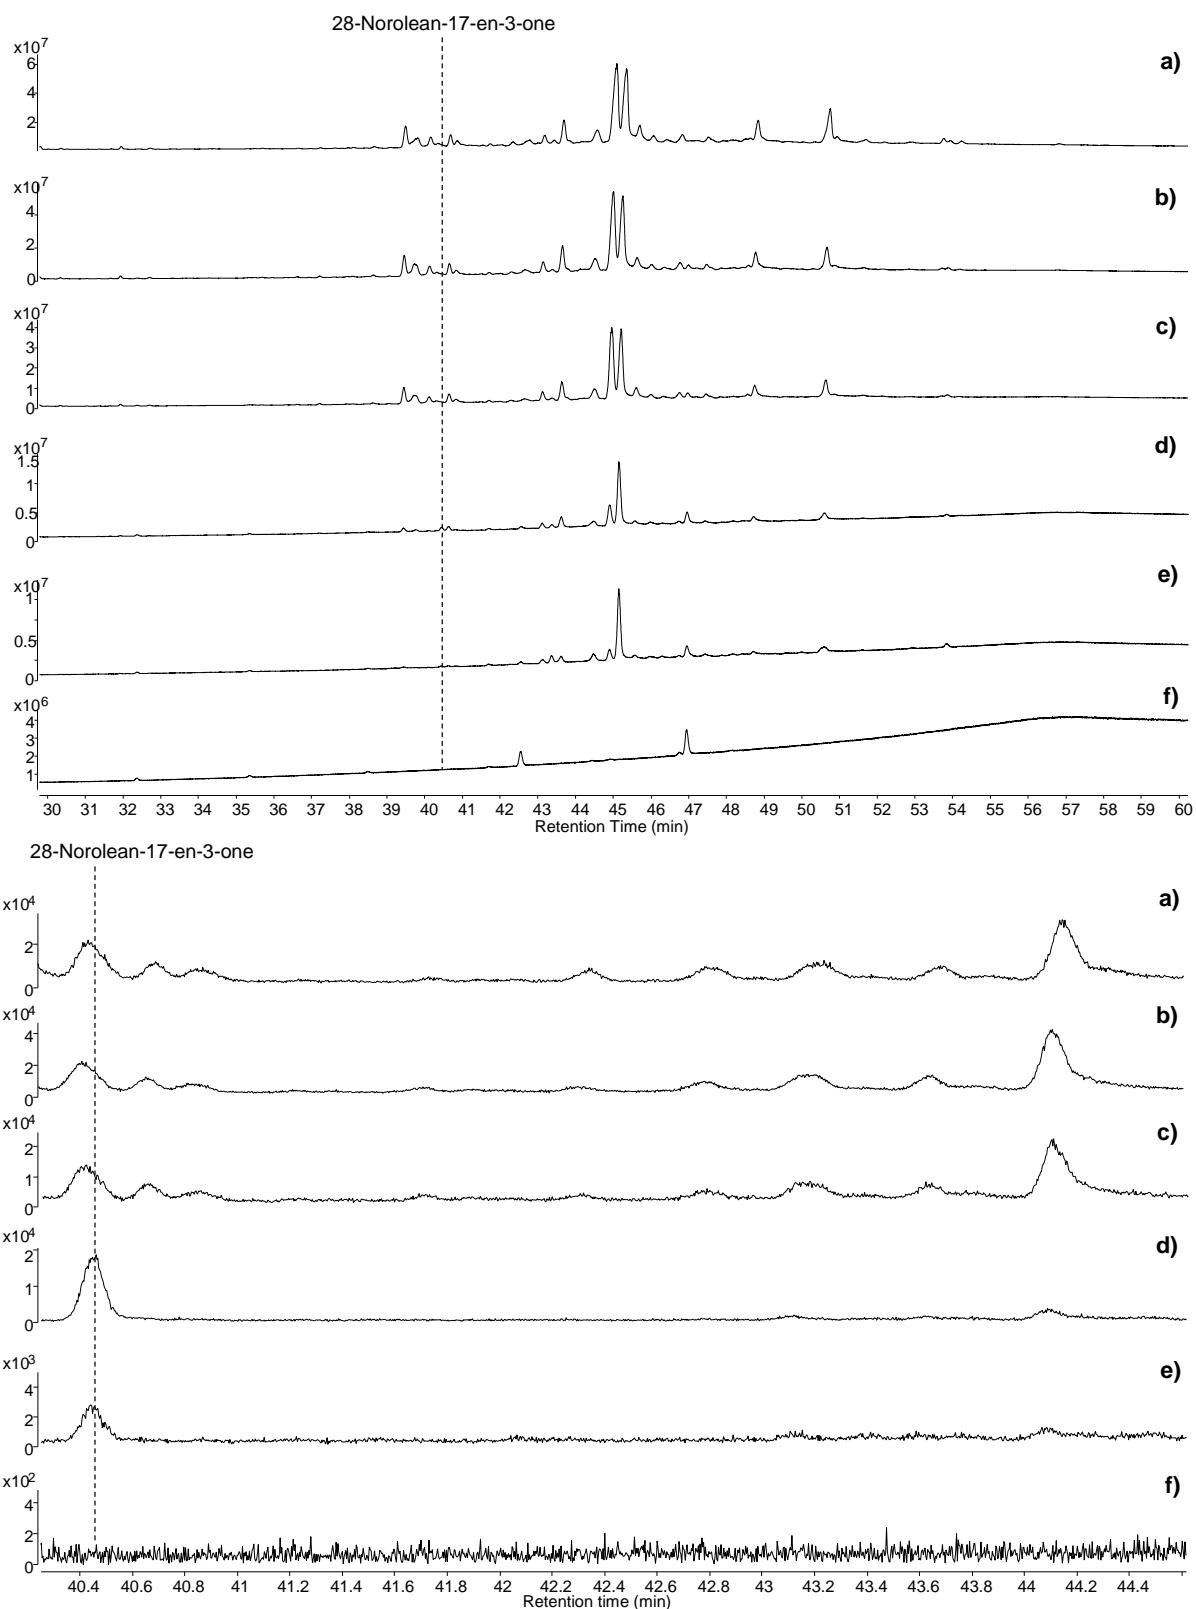

**Figure S14.** Expanded view (top) and extracted ion chromatograms (bottom) of  $m/z$  410.3350 for the profiles obtained by GC-QToF analysis of the *Pistacia* reference sample (a) and the samples from the heating experiment at 100°C for 4 hours (b), 100°C for 8 hours (c), 250°C for 0.5 hours (d), 250°C for 2.5 hours (e), 400°C for 10 mins (f). © The Trustees of the British Museum. Shared under a Creative Commons Attribution-NonCommercial-ShareAlike 4.0 International (CC BY-NC-SA 4.0) licence.

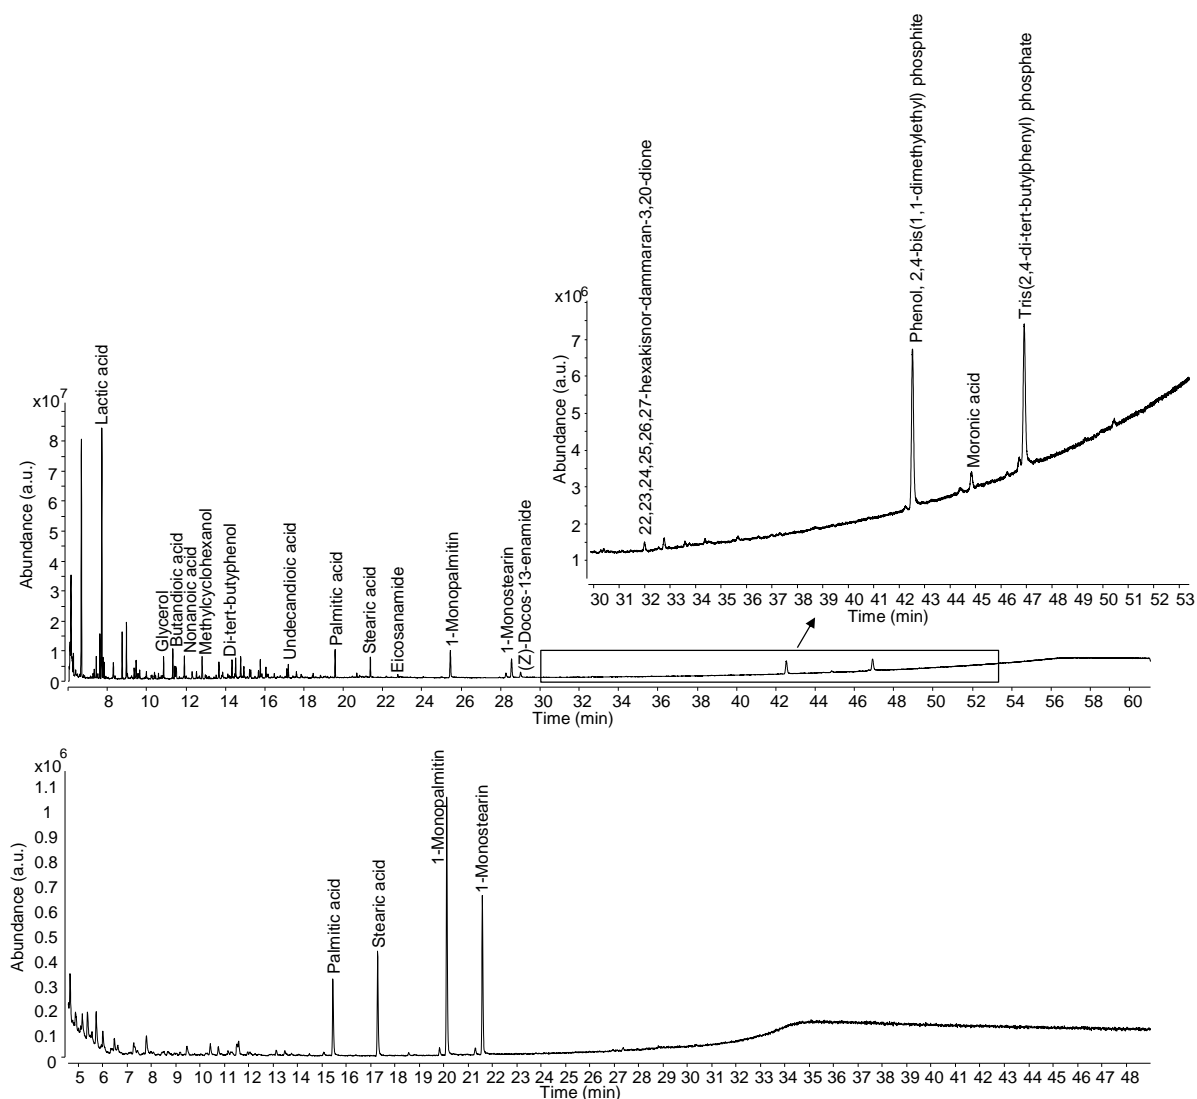

**Figure S15.** Comparison between the chromatograms obtained for sample C13-R7 by using GC-QToF and optimised conditions (**top**), and standard GC-MS with non-optimised conditions (**bottom**). The main compounds are indicated, and an expansion of the top chromatogram is provided, showing *Pistacia* resin markers not detected in the bottom chromatogram. © The Trustees of the British Museum. Shared under a Creative Commons Attribution-NonCommercial-ShareAlike 4.0 International (CC BY-NC-SA 4.0) licence.

**Table S1.** Compounds detected in the Uluburun samples not listed in Table 2. The monoterpenoids exact structures are difficult to assign in most cases without standards. This was beyond the scope of this article, and we refer to the available literature [1-5].

| N° | Compound                                | Retention time | Raw formula                                       | Calculated <i>m/z</i> * | Fragment ions*                                                                                           |
|----|-----------------------------------------|----------------|---------------------------------------------------|-------------------------|----------------------------------------------------------------------------------------------------------|
| a  | 1-methyl-4-(1-methylethenyl)-benzene    | 8.27           | C <sub>10</sub> H <sub>12</sub>                   | 132.0934                | <b>117.0697</b> , 115.0541, 91.0541, 65.0385                                                             |
| b  | monoterpene 1                           | 8.55           | C <sub>10</sub> H <sub>16</sub> O                 | 152.1196                | 137.0961, 119.0855, 109.1010, 95.0491, 91.0542, 82.0776, 79.0541, <b>67.0541</b> , 55.0542               |
| c  | bornanone                               | 9.11           | C <sub>10</sub> H <sub>16</sub> O                 | 152.1196                | 143.0521, 108.0931, <b>95.0854</b> , 81.0696, 67.0540, 55.0541                                           |
| d  | monoterpene 2                           | 9.62           | C <sub>10</sub> H <sub>14</sub> O                 | 150.1039                | <b>135.0879</b> , 119.0488, 105.0697, 91.0540, 65.0384                                                   |
| e  | 4,6,6-trimethyl-bicyclo-hept-3-en-2-one | 10.00          | C <sub>10</sub> H <sub>14</sub> O                 | 150.1039                | 135.0803, 122.1087, <b>107.0855</b> , 91.0541, 79.0540, 67.541                                           |
| f  | monoterpene 3 -TMS                      | 10.24          | C <sub>13</sub> H <sub>24</sub> OSi               | 224.1591                | 209.1354, 181.1042, 165.0728, <b>144.0990</b> , 129.0728, 119.0852, 105.0697, 91.0540, 73.0467           |
| g  | monoterpene 4 -TMS                      | 10.77          | C <sub>13</sub> H <sub>24</sub> OSi               | 224.1591                | 209.1356, 181.1043, <b>155.0894</b> , 134.1088, 119.0853, 101.0415, 92.0617, 91.0541, 73.0472            |
| h  | monoterpene 5 -TMS                      | 11.31          | C <sub>13</sub> H <sub>22</sub> OSi               | 222.1434                | <b>207.1274</b> , 191.0886, 177.0728, 133.1008, 117.0697, 105.0697, 91.0540, 73.0467                     |
| i  | monoterpene 6 -TMS                      | 12.19          | C <sub>13</sub> H <sub>26</sub> O <sub>2</sub> Si | 242.1697                | 227.1095, 193.0677, 165.0728, 149.0957, <b>133.1063</b> , 119.0489, 105.0696, 91.0540, 73.0672, 65.0384  |
| j  | monoterpene 7 -TMS                      | 12.24          | C <sub>13</sub> H <sub>24</sub> O <sub>2</sub> Si | 240.1540                | 225.1303, 150.1038, 117.0364, <b>108.0932</b> , 93.0697, 73.0466                                         |
| k  | cuminyl alcohol (?)                     | 12.43          | C <sub>13</sub> H <sub>22</sub> OSi               | 222.1432                | 207.1197, 179.0885, 165.0729, <b>133.1010</b> , 117.0696, 105.0697, 96.0479, 91.0540, 73.0466            |
| l  | myrtenoic acid                          | 12.64          | C <sub>13</sub> H <sub>22</sub> O <sub>2</sub> Si | 238.1384                | 223.1148, 195.0832, 179.0521, 148.0880, 133.0646, 105.0696, 91.0541, <b>73.0467</b>                      |
| m  | monoterpene 8 -TMS                      | 13.08          | C <sub>13</sub> H <sub>22</sub> O <sub>2</sub> Si | 238.1384                | 223.1149, 195.0835, 167.0886, 151.0573, 144.0963, 133.0646, 119.0854, 105.0697, 91.0541, <b>73.0466</b>  |
| n  | monoterpene 9 -TMS                      | 13.47          | C <sub>13</sub> H <sub>22</sub> O <sub>2</sub> Si | 238.1384                | 223.1148, 205.1043, 181.1043, <b>135.0802</b> , 91.0542, 73.0467                                         |
| o  | monoterpene 10 -TMS                     | 13.98          | C <sub>13</sub> H <sub>20</sub> O <sub>2</sub> Si | 236.1227                | <b>221.1020</b> , 202.1715, 193.0677, 177.1093, 147.0801, 132.0929, 119.0853, 103.0374, 91.0540, 73.0466 |



|   |                       |       |                                                                |          |                                                                                                                                                                                                                                                   |
|---|-----------------------|-------|----------------------------------------------------------------|----------|---------------------------------------------------------------------------------------------------------------------------------------------------------------------------------------------------------------------------------------------------|
| p | monoterpene 11 - TMS  | 14.39 | C <sub>13</sub> H <sub>20</sub> O <sub>3</sub> Si              | 252.1176 | 237.0940, 224.1226, 209.0990, 193.0679, 183.0835, 167.0522, 162.0674, 134.0724, 119.0490, 106.0775, 91.0541, <b>73.0467</b>                                                                                                                       |
| q | monoterpene 12 - TMS  | 15.22 | C <sub>16</sub> H <sub>30</sub> O <sub>3</sub> Si <sub>2</sub> | 326.1728 | 311.1495, 283.1181, 255.1230, 236.1223, 221.0627, 207.1199, 193.1040, 177.0729, 144.0963, 119.0852, 91.0541, <b>73.0466</b>                                                                                                                       |
| r | monoterpene 13 - TMS  | 15.86 | C <sub>13</sub> H <sub>20</sub> O <sub>3</sub> Si              | 252.1176 | <b>237.1003</b> , 221.0628, 193.1040, 179.0520, 163.0751, 147.0438, 120.0566, 111.0349, 105.0332, 91.0541, 73.0466                                                                                                                                |
| s | Unknown 370_1 (2TMS)  | 16.99 | C <sub>20</sub> H <sub>26</sub> O <sub>3</sub> Si <sub>2</sub> | 370.1415 | 355.1212, 342.1677, 327.1441, <b>309.1337</b> , 252.1176, 219.0835, 192.0964, 177.0730, 147.0439, 115.0543, 91.0541, 73.0466                                                                                                                      |
| t | Unknown 370_2 (2TMS)  | 17.45 | C <sub>20</sub> H <sub>26</sub> O <sub>3</sub> Si <sub>2</sub> | 370.1415 | 355.1213, 325.1288, <b>235.1147</b> , 221.0629, 207.0835, 193.0315, 177.0730, 147.0440, 91.0541, 73.0467                                                                                                                                          |
| u | Tetracyclic terpenoid | 24.8  | C <sub>24</sub> H <sub>38</sub>                                | 326.2968 | 314.2606, 299.2371, 271.2419, 229.1951, 219.1742, 205.1588, 189.1637, 175.1480, 161.1324, 147.1167, 133.1011, 121.1012, 108.0932, <b>95.0855</b> , 79.0542, 67.0542, 55.0542                                                                      |
| v | Tetracyclic terpenoid | 25.61 | C <sub>22</sub> H <sub>36</sub> O                              | 316.2761 | 301.2528, 283.2421, <b>205.1587</b> , 189.1638, 163.1117, 149.1323, 135.1166, 121.1010, 108.0931, 95.0854, 81.0698, 67.0542, 55.0542                                                                                                              |
| w | Tetracyclic terpenoid | 26.24 | C <sub>25</sub> H <sub>46</sub> OSi                            | 390.3312 | 375.3077, 300.2811, 285.2578, <b>261.2570</b> , 217.1950, 205.1949, 189.1637, 177.1637, 163.1480, 149.1323, 135.1166, 123.1166, 109.1009, 95.0853, 81.0697, 73.0466, 67.0541, 55.0541                                                             |
| x | Tetracyclic terpenoid | 30.29 | C <sub>28</sub> H <sub>48</sub> O <sub>2</sub> Si              | 444.3418 | 429.3180, 356.2711, 341.2475, 330.2554, 323.2370, 275.2367, 257.2261, 205.1586, 189.1636, 169.1036, 161.1323, 147.1166, 135.1166, 121.1010, 107.0853, <b>97.0647</b> , 81.0697, 73.0467, 67.0541, 55.0541                                         |
| y | Tetracyclic terpenoid | 30.55 | C <sub>28</sub> H <sub>54</sub> O <sub>2</sub> Si <sub>2</sub> | 478.3657 | 463.3428, 388.3155, 349.2920, 283.2421, 259.2420, 189.1638, 183.1200, <b>169.1044</b> , 147.1167, 135.1167, 129.0728, 121.1011, 107.0855, 95.0855, 81.0698, 73.0468                                                                               |
| z | Tetracyclic terpenoid | 31.05 | C <sub>29</sub> H <sub>52</sub> O <sub>2</sub> Si              | 460.3731 | 445.3490, 430.3254, 415.3027, 389.2874, 347.2768, 325.2526, 314.2602, 299.2368, <b>274.2292</b> , 257.2265, 231.1744, 219.1741, 201.1636, 187.1482, 161.1323, 147.1167, 129.0727, 121.1011, 107.0855, 95.0854, 81.0698, 73.0467, 67.0541, 55.0542 |
| α | Tetracyclic terpenoid | 33.57 | C <sub>26</sub> H <sub>44</sub> O <sub>3</sub> Si              | 432.3054 | 417.2827, 342.2559, 333.2243, 314.2596, 299.2371, 243.1744, 229.1947, 215.1794, 205.1587, 187.1481, 161.1324, 147.1168, <b>129.0366</b> , 121.1011, 109.1010, 95.0854, 81.0698, 75.0260, 67.0542, 55.0542                                         |

|   |                                    |       |                                                                |          |                                                                                                                                                                                                                                         |
|---|------------------------------------|-------|----------------------------------------------------------------|----------|-----------------------------------------------------------------------------------------------------------------------------------------------------------------------------------------------------------------------------------------|
| β | Tetracyclic terpenoid              | 34.36 | C <sub>29</sub> H <sub>54</sub> O <sub>3</sub> Si <sub>2</sub> | 506.3606 | 491.3379, 449.3264, 416.3110, 401.2871, <b>377.2870</b> , 333.2244, 319.2087, 287.2372, 259.2423, 224.1227, 203.1794, 189.1639, 177.1636, 161.1324, 135.1166, 129.0366, 121.1011, 109.1011, 95.0855, 73.0467, 55.0542                   |
| γ | Triterpenoid – isomastica skeleton | 38.58 | C <sub>33</sub> H <sub>58</sub> OSi                            | 498.4263 | 483.4024, <b>393.3518</b> , 311.2734, 269.2263, 255.2107, 241.1951, 227.1795, 215.1793, 201.1637, 189.1637, 173.1325, 159.1167, 145.1013, 135.1167, 121.1011, 109.1011, 95.0854, 81.0697, 73.0467, 69.0698, 55.0542                     |
| δ | Triterpenoid                       | 41.43 | C <sub>36</sub> H <sub>64</sub> O <sub>2</sub> Si <sub>2</sub> | 584.4439 | 569.4207, 498.4260, 482.3945, 467.3708, 388.3159, 398.2653, 279.2135, 229.1951, 203.1793, 190.1713, 175.1481, 161.1324, 147.1168, <b>136.1246</b> , 129.0725, 121.1011, 107.0855, 91.0698, 81.0697, 73.0467, 69.0698, 55.0542           |
| ε | Triterpenoid – isomastica skeleton | 41.83 | C <sub>36</sub> H <sub>66</sub> O <sub>2</sub> Si <sub>2</sub> | 586.4601 | 571.4371, 498.4257, 483.4024, <b>393.3521</b> , 255.2106, 241.1951, 229.1950, 215.1793, 201.1637, 187.1481, 173.1323, 159.1167, 147.1168, 135.1166, 119.0854, 109.1011, 95.0855, 81.0698, 75.0260, 69.0698, 55.0542                     |
| ζ | Triterpenoid                       | 44.06 | C <sub>33</sub> H <sub>56</sub> O <sub>2</sub> Si              | 512.4044 | 497.3807, 482.3931, 422.3548, <b>409.3468</b> , 391.3361, 229.1951, 203.1792, 189.1638, 175.1481, 163.1480, 147.1168, 133.1011, 119.0855, 105.1698, 95.0855, 81.0698, 73.0468, 69.0698, 55.0542                                         |
| η | Triterpenoid                       | 44.34 | C <sub>39</sub> H <sub>72</sub> O <sub>4</sub> Si <sub>3</sub> | 688.4733 | 673.4502, 586.4599, 570.4295, 496.4104, 481.3865, 391.3365, <b>216.1873</b> , 203.1794, 189.1636, 175.1479, 161.1325, 143.1062, 129.0855, 107.0854, 95.0855, 81.0698, 73.0467, 69.0698, 55.0542                                         |
| θ | Triterpenoid                       | 48.00 | C <sub>33</sub> H <sub>52</sub> O <sub>3</sub> Si              | 524.3686 | 509.3446, 419.2949, 391.2991, <b>216.1508</b> , 203.1790, 189.1636, 171.1169, 159.1167, 145.1012, 133.1010, 119.0854, 109.1010, 95.0854, 81.0698, 73.0467, 67.0541, 55.0542                                                             |
| ι | Triterpenoid                       | 48.36 | C <sub>33</sub> H <sub>52</sub> O <sub>3</sub> Si              | 524.3686 | 509.3452, 434.3177, 419.2947, 406.3233, 391.2994, 378.2919, 337.2521, <b>309.2214</b> , 269.1899, 244.1819, 229.1587, 185.1322, 169.0678, 157.1017, 143.0865, 133.1010, 119.0854, 107.0854, 95.0854, 81.0698, 73.0467, 67.0542, 55.0542 |
| λ | Triterpenoid                       | 49.16 | C <sub>36</sub> H <sub>64</sub> O <sub>3</sub> Si <sub>2</sub> | 600.4394 | 585.4167, 511.3605, <b>495.3661</b> , 421.3100, 405.3154, 377.3205, 295.2418, 241.1949, 227.1793, 189.1638, 169.0680, 159.1168, 145.1012, 135.1166, 119.0854, 107.0854, 95.0854, 81.0698, 73.0467, 64.0542, 55.0542                     |

\* the dppm between calculated and experimental masses was below 2 ppm in all cases. Base peak in bold.

## References

1. Pachi, V.K., et al., *Chemical Profiling of Pistacia lentiscus var. Chia Resin and Essential Oil: Ageing Markers and Antimicrobial Activity*. Processes, 2021. **9**(3): p. 418.
2. Tabanca, N., et al., *Chemical Characterization and Biological Activity of the Mastic Gum Essential Oils of Pistacia lentiscus var. chia from Turkey*. Molecules, 2020. **25**(9): p. 2136.
3. Zachariadis, G.A. and A.V. Langioli, *Headspace Solid Phase Microextraction for Terpenes and Volatile Compounds Determination in Mastic Gum Extracts, Mastic Oil and Human Urine by GC– MS*. Analytical Letters, 2012. **45**(9): p. 993-1003.
4. Lo Presti, M., et al., *Evaluation of the volatile and chiral composition in Pistacia lentiscus L. essential oil*. Flavour and Fragrance Journal, 2008. **23**(4): p. 249-257.
5. Rageot, M., et al., *Biomolecular analyses enable new insights into ancient Egyptian embalming*. Nature, 2023. **614**(7947): p. 287-293.



**Table S2.** Summary of the results obtained for the samples taken from varnishes, coatings and residues on Egyptian coffins in the collection of the Fitzwilliam Museum. DAx = aliphatic dicarboxylic acids with x carbon atoms; Fx = aliphatic monocarboxylic acids with x carbon atoms.

Triterpenoid numbers refer to Table 2.

| Object no.     | Sample                                                               | Description                                                                                                         | Compounds identified                                                                                                            |
|----------------|----------------------------------------------------------------------|---------------------------------------------------------------------------------------------------------------------|---------------------------------------------------------------------------------------------------------------------------------|
| E.64.1896      | F01A                                                                 | Varnish on surface of Nakhtefmut cartonnage                                                                         | Triterpenoids: 1; 2; 16; 17; 18<br>Oil/fat lipids: DA7; DA8; DA9; DA10; F16; F18.                                               |
| E.1.1822       | F09A<br>F09B<br>F09C<br>F09D<br>F09E<br>F09F<br>F09G<br>F09H<br>F09K | Yellow resin from various areas of Nespawershefyt coffin (lid and base both outer and inner coffin) and mummy board | Triterpenoids: 1; 2; 16; 17; 18<br>Oil/fat lipids: DA8; DA9; F16; F18; F18:1                                                    |
| E.GA.507.1947  | F15A                                                                 | Yellow varnish from coffin (face)                                                                                   | Triterpenoids: 1; 2; 16; 17; 18<br>Oil/fat lipids: DA7; DA8; DA9; DA10; F16; F18.<br>Diterpenoids: 7-oxo-DHA; 7-oxo-hydroxy-DHA |
| E.GA.528.1947  | F16A                                                                 | Yellow varnish from the surface of a coffin fragment                                                                | Triterpenoids: 1; 2; 16; 17; 18.<br>Oil/fat lipids: DA9 (tr); F16                                                               |
| E.GA.504.1947  | F17A                                                                 | Black resin from coffin (face)                                                                                      | Triterpenoids: 1; 2; 16; 17; 18<br>Oil/fat lipids: F14; F16; F18; F18:1.                                                        |
| E.GA.2672.1943 | F18A                                                                 | Yellow varnish from a coffin fragment                                                                               | Triterpenoids: 1; 2; 16; 17; 18<br>Oil/fat lipids: DA8; DA9; DA10; F14; F16; F18;<br>F18:1                                      |
| E.558.1939     | F20A                                                                 | Yellow varnish from wooden ear (fragment)                                                                           | Triterpenoids: 1; 2; 16; 17; 18<br>Oil/fat lipids: DA8; DA9; F16; F18.                                                          |
| E.GA.6548.1943 | F21A                                                                 | Yellow varnish from cartonnage fragment                                                                             | Triterpenoids: 1; 2; 16; 17; 18<br>Oil/fat lipids: nd                                                                           |
| E.GA.2888.1943 | F23A                                                                 | Yellow varnish from cartonnage fragment (below wing)                                                                | Triterpenoids: 1; 2; 16; 17; 18<br>Oil/fat lipids: DA8; DA9; F14; F16; F18;                                                     |
| E.GA.5851.1943 | F26A                                                                 | Black resin from wooden lotus (coffin fragment)                                                                     | Triterpenoids: 1; 2; 16; 17; 18<br>Oil/fat lipids: DA9; F16; F18;                                                               |
| E.GA.2891.1943 | F27A                                                                 | Golden resin from front of cartonnage fragment                                                                      | Triterpenoids: 1; 2; 16; 17; 18<br>Oil/fat lipids: F14; F16; F18; F18:1                                                         |

|                |      |                                                                 |                                                                                                                                                                       |
|----------------|------|-----------------------------------------------------------------|-----------------------------------------------------------------------------------------------------------------------------------------------------------------------|
| E.GA.1174.1947 | F28A | Golden resin from cartonnage fragment (chin)                    | Triterpenoids: 1; 2; 16; 17; 18<br>Oil/fat lipids: DA7; DA8; DA9; DA10; F16; F18; F18:1<br>Diterpenoids: DHA; 7-oxo-DHA; 7-oxo-hydroxy-DHA                            |
| E.GA.2870.1943 | F30A | Yellow varnish from hand with Djed pillar                       | Triterpenoids: 1; 2; 14;15; 16; 17; 18; 24; 25 and others<br>Oil/fat lipids: nd.                                                                                      |
| EGA.503.1947   | F37A | Black resin from coffin face                                    | Triterpenoids: 1; 2; 14,15,16; 17; 18, 19, 20 and others<br>Oil/fat lipids: DA8; DA9; F16; F18;<br>Diterpenoids: retene; DHA; 7-oxo-DHA; 7-oxo-hydroxy-DHA and others |
| E.200.1939     | F43A | Black resin from coffin face (wig)                              | Triterpenoids: 1; 2; 16; 17; 18<br>Oil/fat lipids: DA8; DA9; DA10; F16; F18; F24; F26<br><i>n</i> -Alkanes C25-C31                                                    |
| E.114.1903     | F45A | Detached fragment of amber coloured resin from Abydos           | Triterpenoids: 1; 2; 6; 13; 14; 15; 17; 18; 19; 20; 24; 25; 33<br>Oil/fat lipids: DA9 (tr); F16; F18; F18:1                                                           |
| E.133.1891     | F46A | Black resin from cartonnage fragment                            | Triterpenoids: 17; 18<br>Oil/fat lipids: DA7; DA8; DA9; F14; F16; F18; F24; F26; F28; F30<br><i>n</i> -Alkanes C25-C33                                                |
| E.W.94         | F52B | Reddish resin from 'loop' of resin on back leg of jackal figure | Triterpenoids: 2; 16; 17; 18<br>Oil/fat lipids: DA8; F14; F16; F18;<br>Diterpenoids: DHA;                                                                             |
